# Supplementary material for: The role of MoS2 as an interfacial layer in graphene/silicon solar cells
Source: Royal Society of Chemistry journal article supplement (doi:10.1039/c5cp00321k), 2015-01-01
Supplement: c5cp00321k1.pdf [file c5cp00321k1.pdf]

## Supporting Information

### **Role of MoS<sub>2</sub> as interfacial layer in graphene/silicon solar cells**

*Kejia Jiao, Chunyang Duan, Xiaofeng Wu, Jiayuan Chen, Yu Wang,\* and Yunfa Chen\**

State Key Laboratory of Multiphase Complex Systems, Institute of Process

Engineering, Chinese Academy of Sciences Beijing 100190 (P.R. China)

E-mail: wyu@home.ipe.ac.cn, yfchen@home.ipe.ac.cn

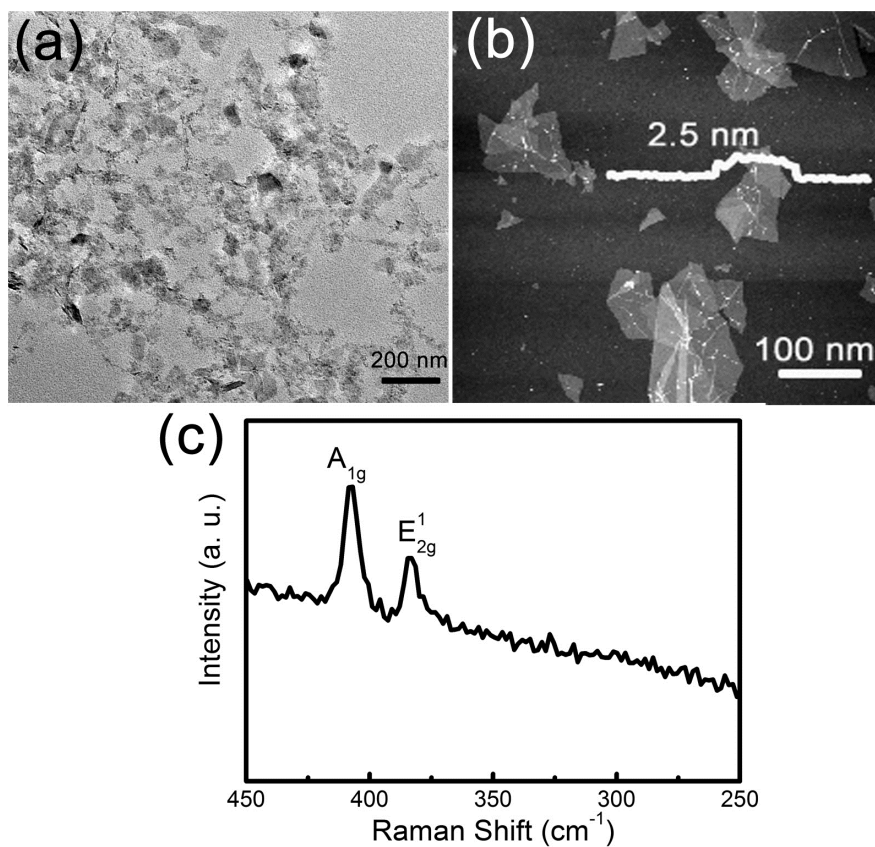

Fig. S1. Characterizations of MoS<sub>2</sub> nanoflakes (a) TEM, (b) AFM, (c) Raman Spectrum

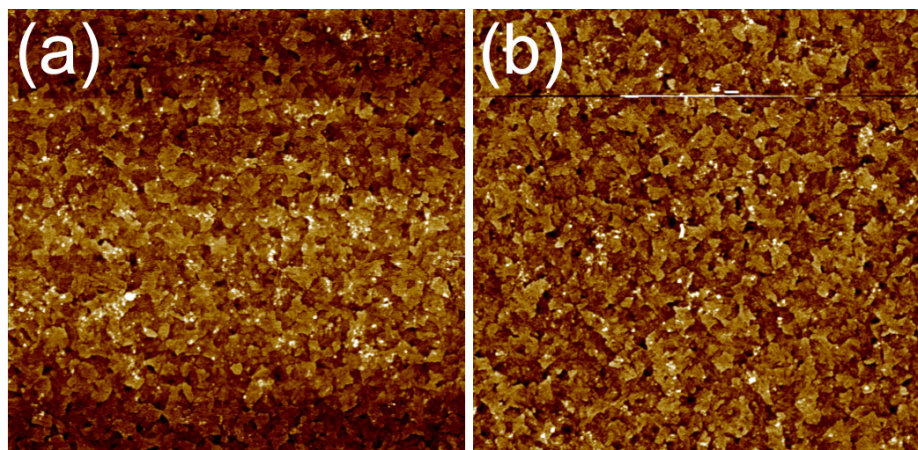

Fig. S2. AFM images of MoS<sub>2</sub> films deposited on Si substrates. (a) MoS<sub>2</sub> (80) film, (b) MoS<sub>2</sub> (200) film. Clearly the Si substrate is uniformly covered by MoS<sub>2</sub> and there are little changes in the morphologies of MoS<sub>2</sub> (80) and MoS<sub>2</sub> (200) films.

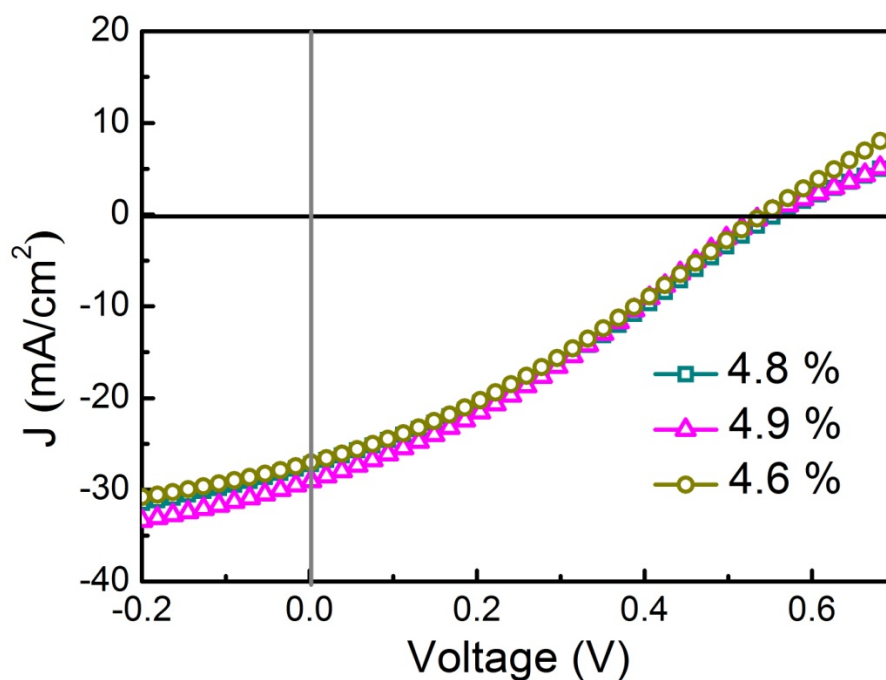

Fig. S3. I-V curves of G/MoS<sub>2</sub>(80, Ar)/n-Si devices. The PCE of G/MoS<sub>2</sub>(80, Ar)/n-Si is very close to that of G/MoS<sub>2</sub>(80)/n-Si device, indicating that the improvements in PCE has nothing to do with SiO<sub>x</sub> layer, but solely due to the MoS<sub>2</sub> interfacial layer.

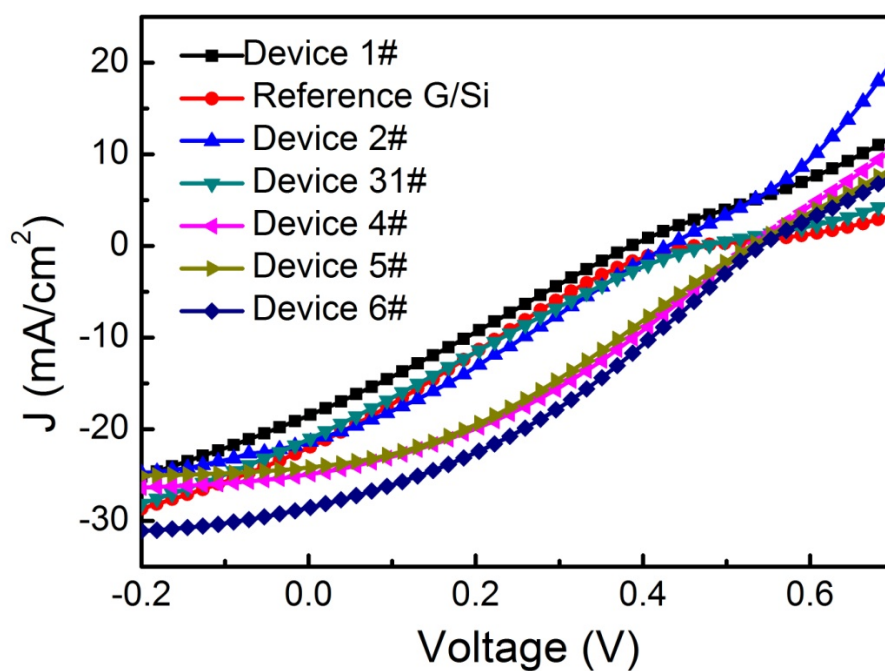

Fig. S4. I-V curves of G/MoS<sub>2</sub>/n-Si devices without thermal treatments. The fluctuations in PCE are ascribed to the instability of un-annealed MoS<sub>2</sub> films when coming into contact with water.

### Discussions on Fig. S4

As can be seen from Fig. S4 and Table S2, there are fluctuations in PCE. We fabricated six parallel devices and it is found that three of them show enhancements in PCE (~5 %) while the other three shows no improvements. It is plausible that the interactions between silicon and un-annealed MoS<sub>2</sub> are not stable enough to give reliable PCE (Note that the graphene is transferred onto silicon using wet-transfer method, so un-annealed MoS<sub>2</sub> films tends to be unstable when coming into contact with water, leading to the fluctuations in PCE). Though the PCE is not stable, it can also be used to exclude the effects of SiO<sub>x</sub>. That is, when the MoS<sub>2</sub> films are not damaged when exposing to water, it can improve the PCE effectively.

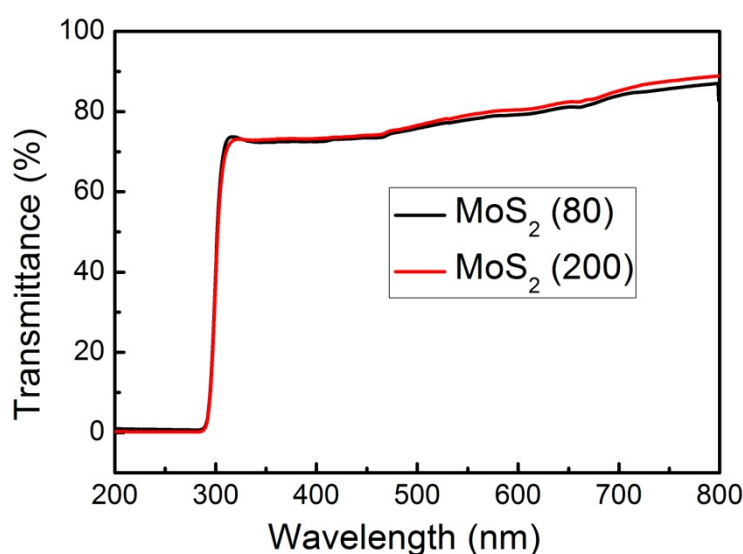

Fig.S5. The transmittance spectra of MoS<sub>2</sub>(80) and MoS<sub>2</sub>(200) films. The measurements are carried out as follows: First MoS<sub>2</sub> nanoflake solution is drop-casted onto glass and baked at 80 °C for 15 min. Then the transmittance spectra is measured (i.e., the transmittance spectra of MoS<sub>2</sub> (80) film). The glass is then annealed at 200 °C under the protection of Ar for 15 min and the transmittance spectra of MoS<sub>2</sub>(200) is obtained. Clearly there is little change for the same MoS<sub>2</sub> film with different annealing temperature.

**Table S1.** Device parameters of solar cells in Fig. S3.

|            | J <sub>sc</sub> (mA/cm <sup>2</sup> ) | V <sub>oc</sub> (V) | FF   | PCE (%) |
|------------|---------------------------------------|---------------------|------|---------|
| Green line | 27.2                                  | 0.55                | 0.32 | 4.8     |
| Pink line  | 29                                    | 0.54                | 0.32 | 4.9     |
| Tawny line | 27                                    | 0.54                | 0.32 | 4.6     |

**Table S2.** Device parameters of solar cells in Fig.S4.

|     | $J_{sc}$ (mA/cm <sup>2</sup> ) | $V_{oc}$ (V) | FF   | PCE (%) |
|-----|--------------------------------|--------------|------|---------|
| 1 # | 18.4                           | 0.37         | 0.28 | 1.88    |
| 2 # | 21.9                           | 0.46         | 0.23 | 2.31    |
| 3 # | 21.3                           | 0.42         | 0.29 | 2.65    |
| 4 # | 24.9                           | 0.52         | 0.36 | 4.62    |
| 5 # | 26.8                           | 0.52         | 0.35 | 4.84    |
| 6 # | 28.6                           | 0.54         | 0.35 | 5.30    |

**Table S3.** Calculated device parameters of solar cells in Fig. 1

| Ann.Temp. (°C) | SBH (eV) | n    | $R_{s1}(\Omega)$ | $R_{s2}(\Omega)$ |
|----------------|----------|------|------------------|------------------|
| Ref.           | 0.64     | 2.24 | 586.3            | 597.8            |
| 80             | 0.72     | 2.25 | 155.7            | 160.0            |
| 200            | 0.65     | 2.57 | 593.0            | 592.2            |

Footnotes:  $R_{s1}$  and  $R_{s2}$  are calculated respectively from the  $dV/d(\ln J)$  vs  $J$  plot and  $H(J)$  vs  $J$  plot to see the consistency of the method.

**Table S4.** MoS<sub>2</sub> film thickness measured by ellispometer.

|             | 1    | 2    | 3    | Average (nm) |
|-------------|------|------|------|--------------|
| Green Curve | 1.87 | 1.72 | 1.80 | <b>1.80</b>  |
| Blue Curve  | 2.38 | 2.45 | 2.40 | <b>2.41</b>  |
| Red Curve   | 3.60 | 3.55 | 3.58 | <b>3.58</b>  |
| Black Curve | 4.62 | 4.60 | 4.59 | <b>4.60</b>  |

**Table S5.** Photovoltaic parameters of devices in Fig. 8.

| $\delta$ (nm) | $V_{oc}$ (V) | $J_{sc}$ (mA/cm <sup>2</sup> ) | FF   | PCE (%) |
|---------------|--------------|--------------------------------|------|---------|
| 4.60          | 0.5          | 19.6                           | 0.27 | 2.63    |
| 3.58          | 0.52         | 23.1                           | 0.30 | 3.65    |
| 2.41          | 0.5          | 27.2                           | 0.32 | 4.45    |
| 1.80          | 0.52         | 27.0                           | 0.32 | 4.50    |
